# Supplementary material
Source: MDPI journal article supplement (https://www.mdpi.com/1996-1073/14/13/3786)
Supplement: s1 [file s1]

Supplementary Materials

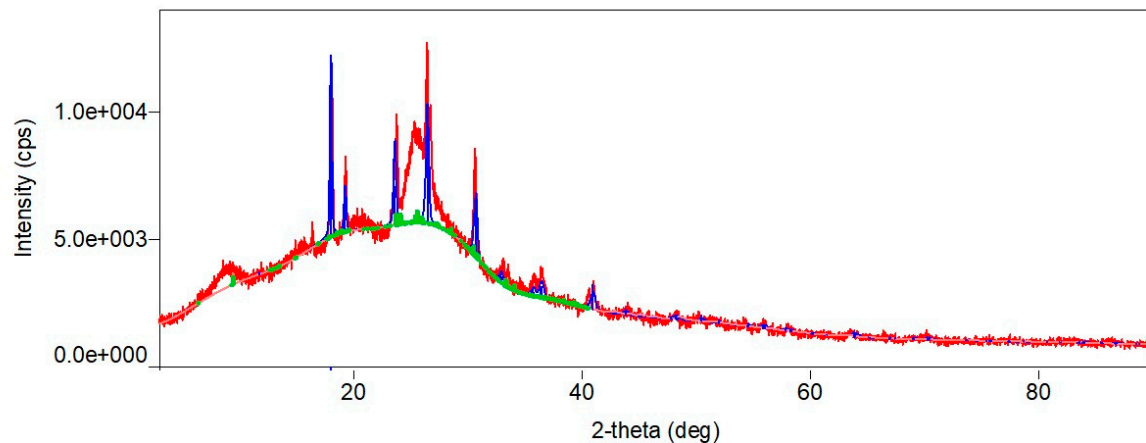

Figure S1. Bare PANI coated on glass substrate

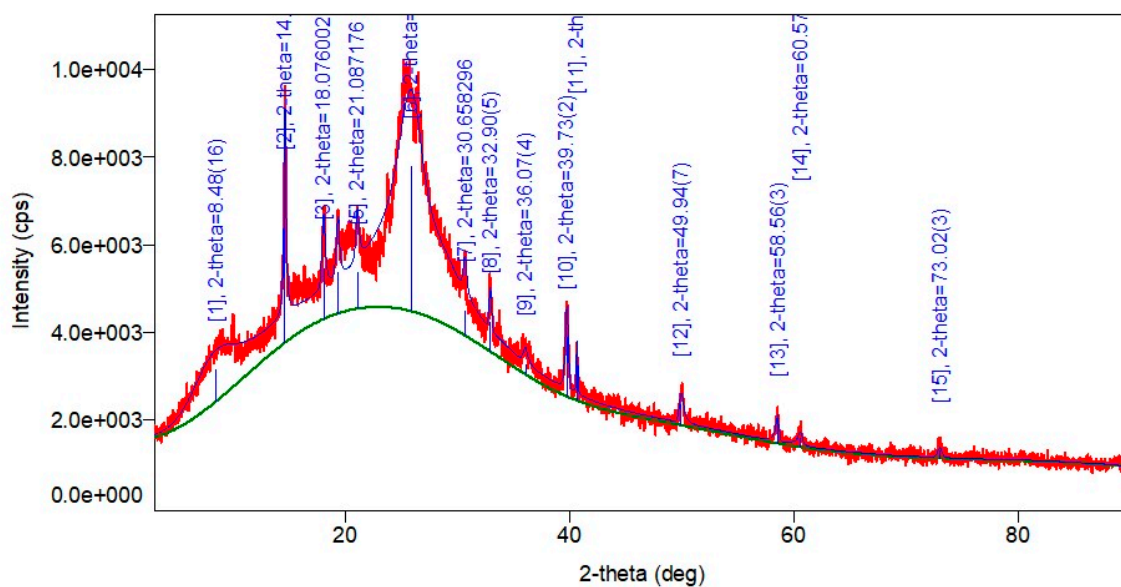

Figure S2. PANI – 0.5wt% MoS<sub>2</sub> coated on glass substrate

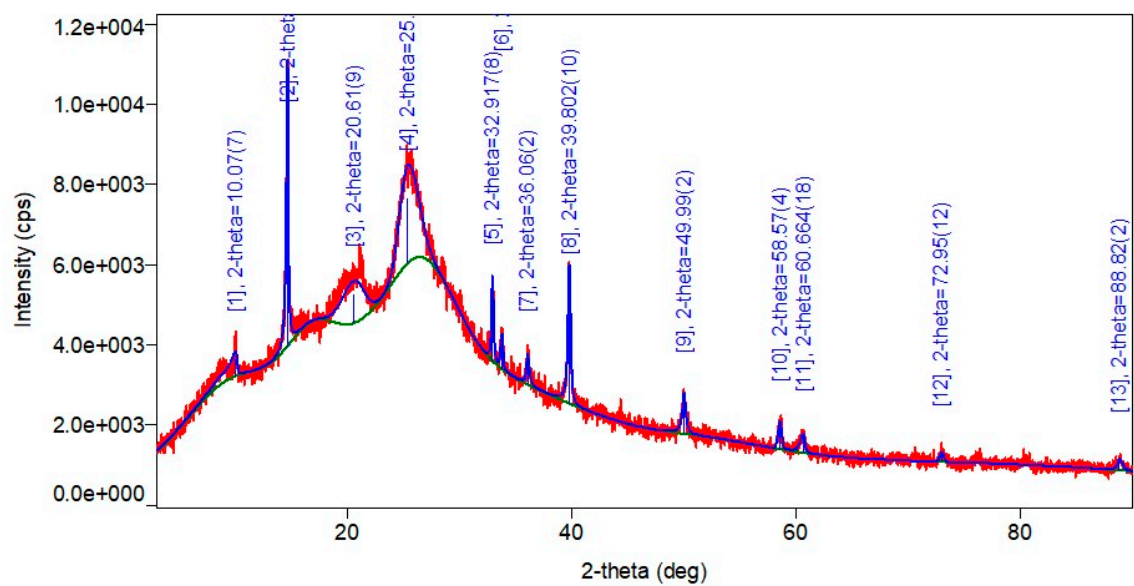

Figure S3. PANI – 2wt% MoS<sub>2</sub> coated on glass substrate

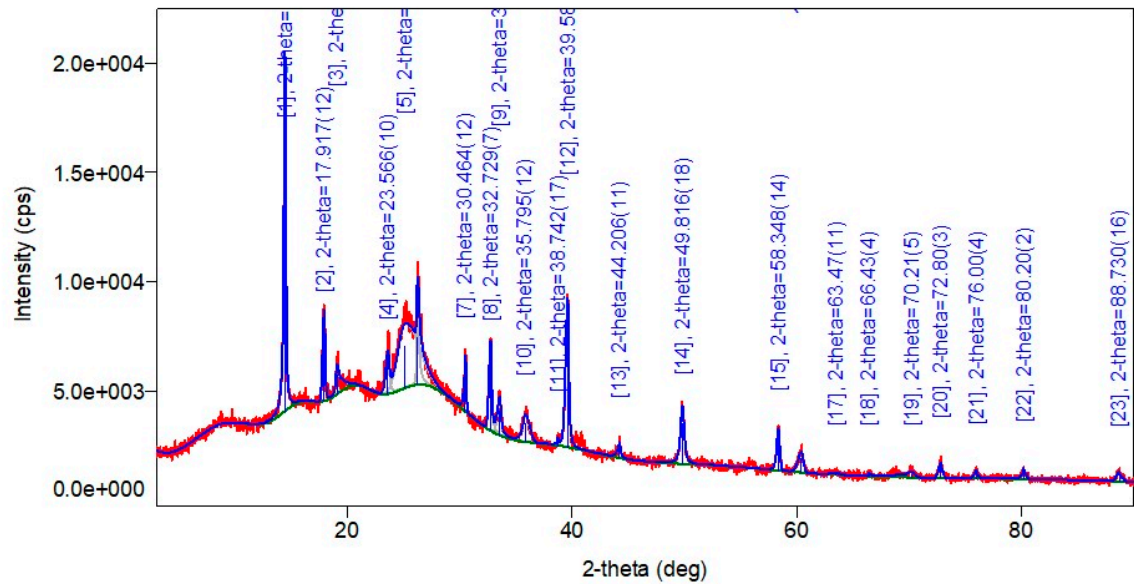

Figure S4. PANI – 7wt% MoS<sub>2</sub> coated on glass substrate

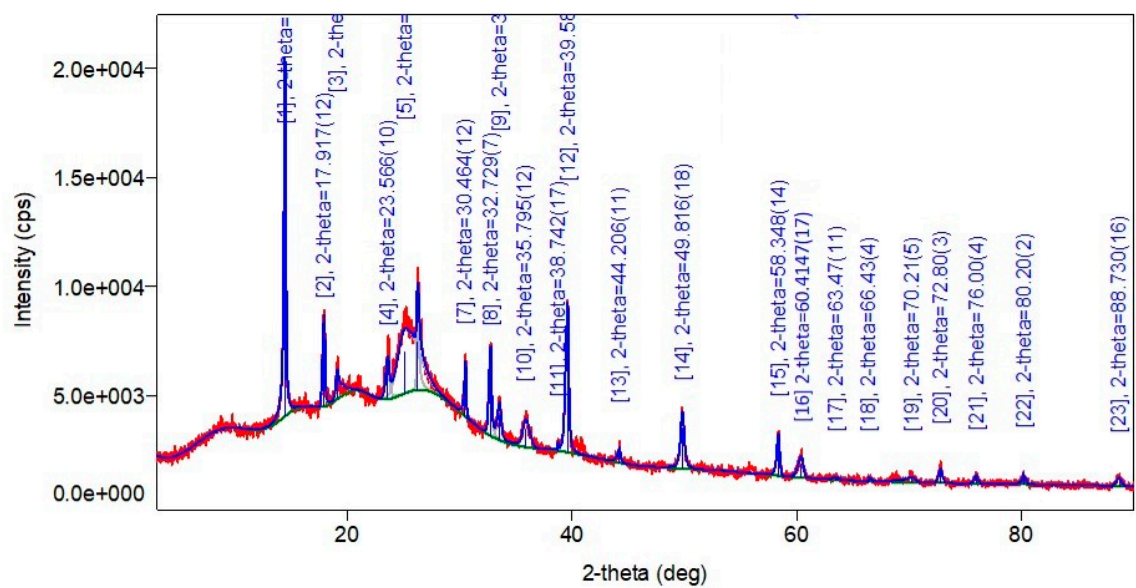

Figure S5. PANI – 9wt% MoS2 coated on glass substrate

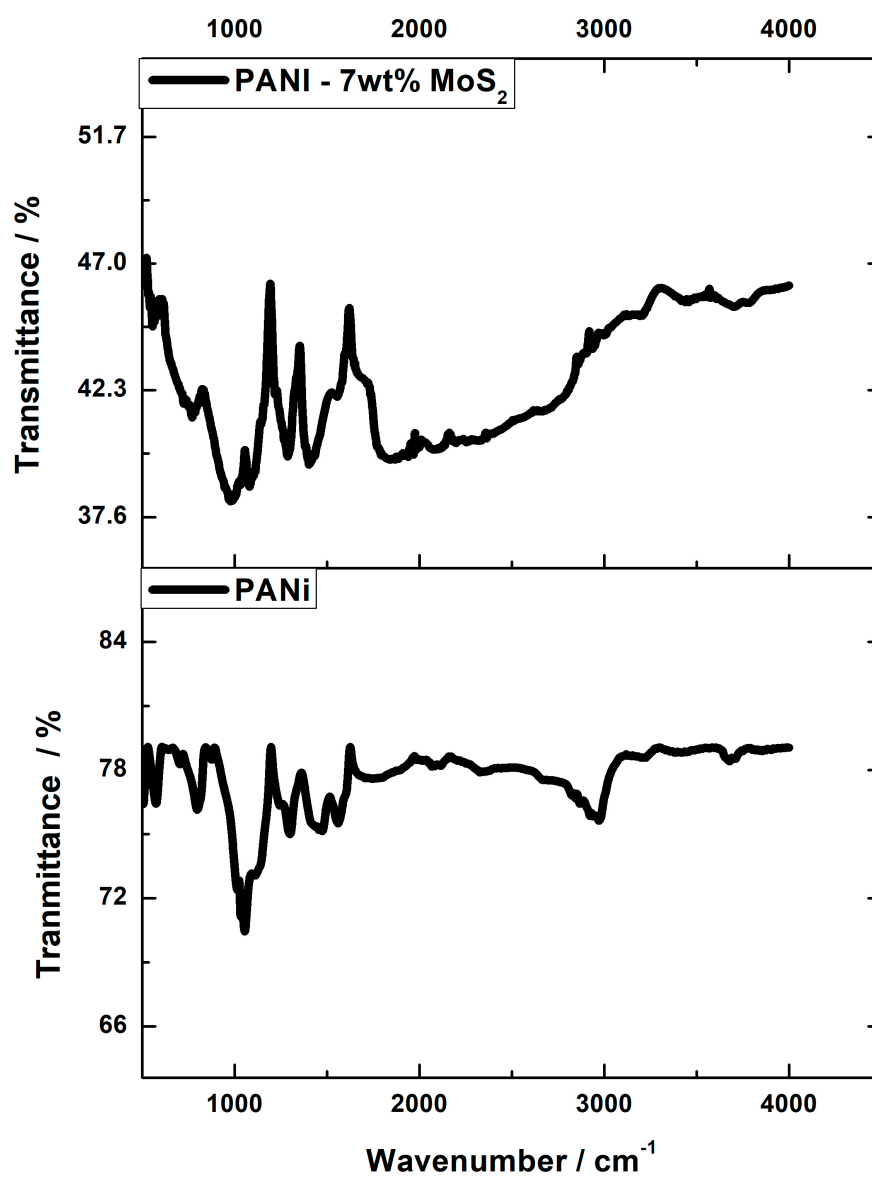

Figure S6. FTIR spectra of pure PANI and PANI/7wt% MoS<sub>2</sub> composite.
